# Supplementary material for: RNA Extraction Alternative Method for SARS-CoV-2 Molecular Diagnosis
Source: Preprints.org preprint supplement (doi:10.20944/preprints202105.0342.v1), 2021-05-14
Supplement: Supplementary file 1 [file supplementary]

## Sheet: data set
	Adapted Rneasy					Roche magnapure
Sample ID	Bact	N1	N2	RESULT		Bact	N1	N2	RESULT
1	29.4787	UND	UND	NEGATIVE		32.67	UND	UND	NEGATIVE
2	21.8482	23.9723	22.8943	POSITIVE		22.37	33	UND	POSITIVE N1
3	32.4508	UND	UND	NEGATIVE		28.23	UND	UND	NEGATIVE
4	21.1135	UND	UND	NEGATIVE		24.46	UND	UND	NEGATIVE
5	24.4576	UND	UND	NEGATIVE		25.26	UND	UND	NEGATIVE
6	22.4868	UND	UND	NEGATIVE		21.05	UND	UND	NEGATIVE
7	25.4047	36.7229	34.1417	POSITIVE		23.55	36.46	UND	POSITIVE N1
8	29.4637	UND	UND	NEGATIVE		25.82	UND	UND	NEGATIVE
9	22.7873	UND	UND	NEGATIVE		22.66	UND	UND	NEGATIVE
10	22.6142	UND	UND	NEGATIVE		22.22	UND	UND	NEGATIVE
11	29.5577	UND	UND	NEGATIVE		25.72	UND	UND	NEGATIVE
12	29.0078	UND	UND	NEGATIVE		25.19	UND	UND	NEGATIVE
13	23.4958	UND	UND	NEGATIVE		20.38	UND	UND	NEGATIVE
14	30.8401	UND	UND	NEGATIVE		26.97	UND	UND	NEGATIVE
15	27.5637	UND	UND	NEGATIVE		26.08	UND	UND	NEGATIVE
16	27.9923	UND	UND	NEGATIVE		25.74	UND	UND	NEGATIVE
17	28.3985	UND	UND	NEGATIVE		25.66	UND	UND	NEGATIVE
18	24.7374	UND	UND	NEGATIVE		24.5	UND	UND	NEGATIVE
19	26.174	20.9612	19.7268	POSITIVE		22.08	17.16	18.46	POSITIVE
20	26.5655	21.0427	21.0866	POSITIVE		23.26	19.46	21	POSITIVE
21	24.4009	UND	UND	NEGATIVE		23.07	UND	UND	NEGATIVE
22	24.801	UND	UND	NEGATIVE		22.49	UND	UND	NEGATIVE
23	22.4404	UND	UND	NEGATIVE		21.15	UND	UND	NEGATIVE
24	21.7797	UND	UND	NEGATIVE		20.3	UND	UND	NEGATIVE
25	30.2854	UND	UND	NEGATIVE		24.71	UND	UND	NEGATIVE
26	28.5581	UND	UND	NEGATIVE		23.78	UND	UND	NEGATIVE
27	22.1418	UND	UND	NEGATIVE		21.42	UND	UND	NEGATIVE
28	23.6171	34.2986	36.5119	POSITIVE		22.9	37.64	UND	POSITIVE N1
29	21.83	UND	UND	NEGATIVE		20.99	UND	UND	NEGATIVE
30	25.66	UND	UND	NEGATIVE		22.48	UND	UND	NEGATIVE
31	24.5502	UND	UND	NEGATIVE		23.2	UND	UND	NEGATIVE
32	24.3633	UND	UND	NEGATIVE		24.1	UND	UND	NEGATIVE
33	21.6078	UND	UND	NEGATIVE		19.86	UND	UND	NEGATIVE
34	22.9994	UND	UND	NEGATIVE		21.36	UND	UND	NEGATIVE
35	26.0751	UND	UND	NEGATIVE		25.52	UND	UND	NEGATIVE
36	23.2624	UND	UND	NEGATIVE		24.18	UND	UND	NEGATIVE
37	24.2888	UND	UND	NEGATIVE		24.08	UND	UND	NEGATIVE
38	18.272	UND	UND	NEGATIVE		17.42	UND	UND	NEGATIVE
39	27.6181	32.2351	31.1507	POSITIVE		26.22	27.41	31.96	POSITIVE
40	20.5094	34.7664	36.5688	POSITIVE		20.13	UND	39.93	POSITIVE N2
41	19.7864	29.1639	30.069	POSITIVE		19.49	29.57	32.26	POSITIVE
42	22.7062	37.0908	UND	POSITIVE N1		28.16	UND	UND	NEGATIVE
43	19.636	33.4676	35.4148	POSITIVE		20.31	33.45	38.07	POSITIVE
44	19.0365	28.5193	27.8622	POSITIVE		19.51	30.03	34.63	POSITIVE
45	19.851	31.9073	32.7784	POSITIVE		19.41	32.61	36.66	POSITIVE
46	28.5999	36.8291	UND	POSITIVE N1		29.99	UND	UND	NEGATIVE
47	19.4996	UND	UND	NEGATIVE		19.69	UND	UND	NEGATIVE
48	18.9105	UND	UND	NEGATIVE		18.71	UND	UND	NEGATIVE
49	19.2288	UND	UND	NEGATIVE		19.92	UND	UND	NEGATIVE
50	19.4647	UND	UND	NEGATIVE		20.69	UND	UND	NEGATIVE
51	18.7339	UND	UND	NEGATIVE		18.83	UND	UND	NEGATIVE
52	18.7389	UND	UND	NEGATIVE		18.74	UND	UND	NEGATIVE
53	19.7322	UND	UND	NEGATIVE		19.47	UND	UND	NEGATIVE
54	19.77	UND	UND	NEGATIVE		20.56	UND	UND	NEGATIVE
55	34.4815	33.3197	32.4007	POSITIVE		25.49	27.99	33.01	POSITIVE
56	31.0692	UND	UND	NEGATIVE		20.79	UND	UND	NEGATIVE
57	30.228	UND	UND	NEGATIVE		28.21	UND	UND	NEGATIVE
58	27.999	UND	UND	NEGATIVE		21.93	36.51	38.75	POSITIVE
59	21.8007	UND	UND	NEGATIVE		27.99	UND	UND	NEGATIVE
60	25.8024	UND	UND	NEGATIVE		21.34	UND	UND	NEGATIVE
61	33.3746	UND	UND	NEGATIVE		29.6	UND	UND	NEGATIVE
62	29.268	UND	UND	NEGATIVE		26.63	UND	UND	NEGATIVE
63	24.2366	UND	UND	NEGATIVE		25.09	UND	UND	NEGATIVE
64	25.4227	UND	UND	NEGATIVE		25.49	UND	UND	NEGATIVE
65	18.7603	UND	UND	NEGATIVE		18.71	UND	UND	NEGATIVE
66	28.3	UND	UND	NEGATIVE		26.3	UND	UND	NEGATIVE
67	24.3	UND	UND	NEGATIVE		26.3	UND	UND	NEGATIVE
68	29.3	UND	UND	NEGATIVE		25.9	UND	UND	NEGATIVE
69	24.7	UND	UND	NEGATIVE		27.1	UND	UND	NEGATIVE
70	25.3	UND	UND	NEGATIVE		26.2	UND	UND	NEGATIVE
71	26.1	UND	UND	NEGATIVE		27.7	UND	UND	NEGATIVE
72	23.7	UND	UND	NEGATIVE		23.05	UND	UND	NEGATIVE
73	18.4	UND	UND	NEGATIVE		17.2	UND	UND	NEGATIVE
74	28.1	UND	UND	NEGATIVE		24	UND	UND	NEGATIVE
75	28.2	UND	UND	NEGATIVE		24.7	UND	UND	NEGATIVE
76	28.4	UND	UND	NEGATIVE		24.8	UND	UND	NEGATIVE
77	26.6	UND	UND	NEGATIVE		23.3	UND	UND	NEGATIVE
78	32.2	UND	UND	NEGATIVE		23	UND	UND	NEGATIVE
79	24.2	UND	UND	NEGATIVE		21.5	UND	UND	NEGATIVE
80	26.4	UND	UND	NEGATIVE		23.64	UND	UND	NEGATIVE
81	25.3	UND	UND	NEGATIVE		23.41	UND	UND	NEGATIVE
82	26.2	UND	UND	NEGATIVE		25.7	UND	UND	NEGATIVE
83	27.3	UND	UND	NEGATIVE		26	UND	UND	NEGATIVE
84	22.6	UND	UND	NEGATIVE		21.4	UND	UND	NEGATIVE
85	25.1721	UND	UND	NEGATIVE		22.1			NEGATIVE
86	23.93	UND	UND	NEGATIVE		25.7	UND	UND	NEGATIVE
87	23.22	UND	UND	NEGATIVE		26	UND	UND	NEGATIVE
88	22.82	UND	UND	NEGATIVE		21.4	UND	UND	NEGATIVE
89	23.308	19.4333	17.9356	POSITIVE		24.5	33.91	37.33	POSITIVE
90	17.8853	36.229	35.6391	POSITIVE		17.24	35.94	UND	POSITIVE N1
91	21.2193	33.3146	33.1281	POSITIVE		24.2	36.73	39.57	POSITIVE
92	26.0945	30.4529	29.1526	POSITIVE		25.81	29.89	32.18	POSITIVE
93	24.5276	UND	UND	NEGATIVE		26.16	UND	UND	NEGATIVE
94	23.0011	34.0847	35.0652	POSITIVE		25.84	38.47	40.16	POSITIVE
95	25.0925	UND	UND	NEGATIVE		26.69	UND	UND	NEGATIVE
96	22.5163	UND	UND	NEGATIVE		23.52	UND	UND	NEGATIVE
